# Supplementary material for: ˙OH-initiated heterogeneous oxidation of methyl orange using an Fe–Ce/MCM-41 catalyst
Source: Royal Society of Chemistry journal article supplement (doi:10.1039/c5ra26820f), 2016-01-01
Supplement: c5ra26820f1.pdf [file c5ra26820f1.pdf]

## Supporting Information

**•OH-initiated Heterogeneous Oxidation of Methyl Orange using the Fe-Ce/MCM-41 Catalyst**

Shuaijun Wang<sup>1</sup>, Chaocheng Zhao\*, Dejun Wang<sup>1</sup>, Yongqiang Wang<sup>1</sup>, and Fang Liu<sup>1</sup>.

*College of Chemical Engineering, China University of Petroleum, Qingdao 266580, P.*

*R. China*

\*Corresponding author

Tel.: +86 13506360770.

E-mail address: zhaochch@upc.edu.cn.

---

\*Corresponding author, Tel.: +86 13506360770, E-mail address: zhaochch@upc.edu.cn

## 2 Materials and methods

### Materials

MCM-41 zeolite was provided by Nankai university. Cerium (III) nitrate hexahydrate  $\text{Ce}(\text{NO}_3)_3 \cdot 6\text{H}_2\text{O}$ , ferric (III) nitrate nonahydrate  $\text{Fe}(\text{NO}_3)_3 \cdot 9\text{H}_2\text{O}$ , were purchased from Qingdao, China. Methyl orange,  $\text{H}_2\text{O}_2$  (30%, v/v),  $\text{H}_2\text{SO}_4$ , NaOH, n-butanol and benzoquinone (BZQ) were obtained from China National Medicines Corporation Ltd. All chemicals were of analytical grade, and double distilled water was used throughout this study.

**Table S1** Texture parameters of the MCM-41 and Fe-Ce/MCM-41

| <b>Samples</b>      | <b>BET (m<sup>2</sup>/g)</b> | <b>Pore size (nm)</b> | <b>Pore volume (cm<sup>3</sup>/g)</b> |
|---------------------|------------------------------|-----------------------|---------------------------------------|
| <b>MCM-41</b>       | 1034                         | 0.36                  | 0.971                                 |
| <b>Fe-MCM-41</b>    | 783                          | 0.32                  | 0.583                                 |
| <b>Fe-Ce/MCM-41</b> | 879                          | 0.34                  | 0.621                                 |

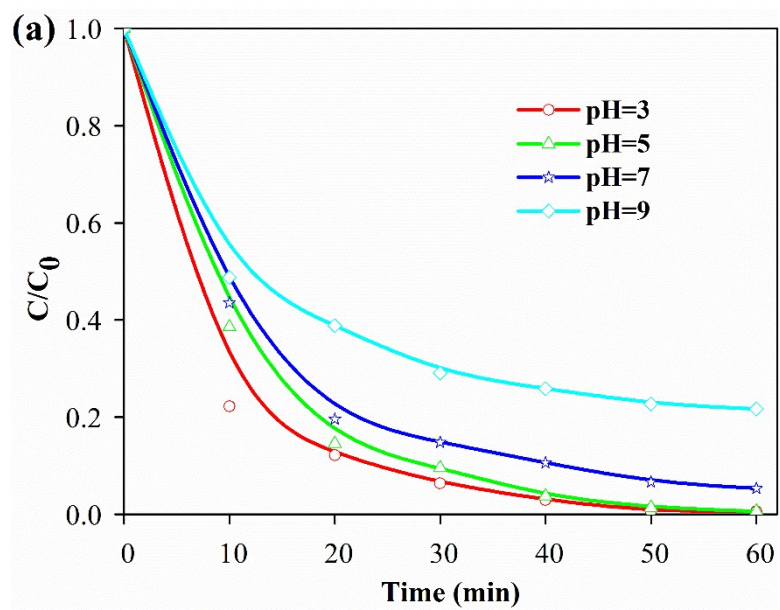

**Figure S1.** Effects of MO concentration on MO oxidation. Experimental conditions: pH 5.0, 2.0 g L<sup>-1</sup> Fe-Ce/MCM-41 catalyst, 20 mM H<sub>2</sub>O<sub>2</sub>, T =30°C.

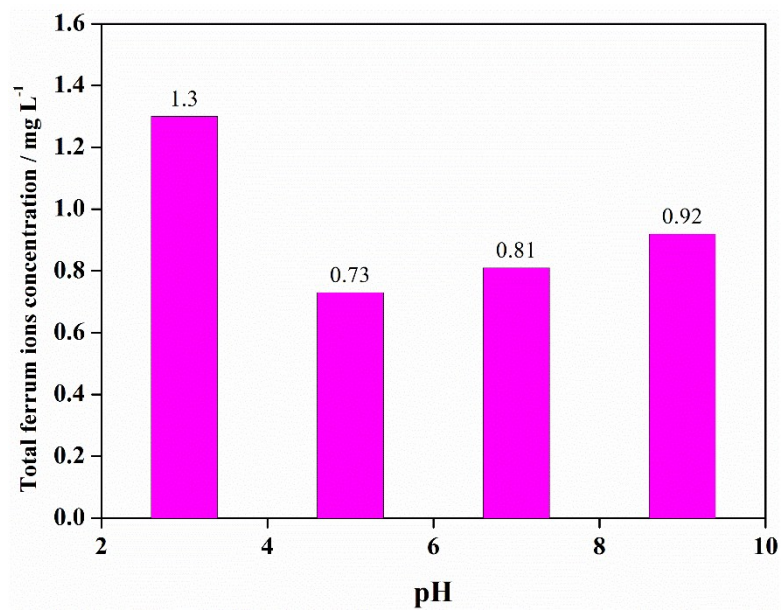

**Figure S2.** Effects of pH on total leached ferrum. Experimental conditions: pH 5.0, 2.0 g L<sup>-1</sup> Fe-Ce/MCM-41 catalyst, 20 mM H<sub>2</sub>O<sub>2</sub>, T =30°C.

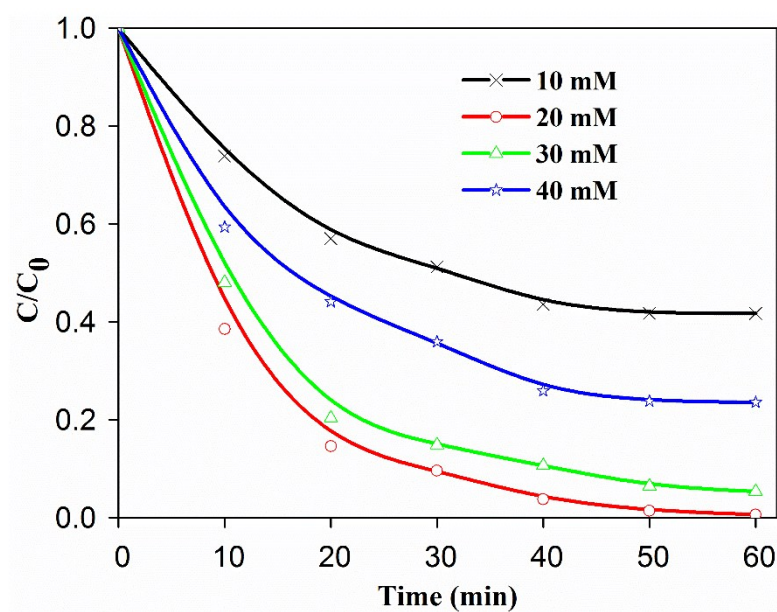

**Figure S3.** Effects of  $H_2O_2$  dosage on MO oxidation. Experimental conditions: pH 5.0,  $2.0 \text{ g L}^{-1}$  Fe-Ce/MCM-41 catalyst,  $T = 30^\circ\text{C}$  and  $100 \text{ mg L}^{-1}$  MO.

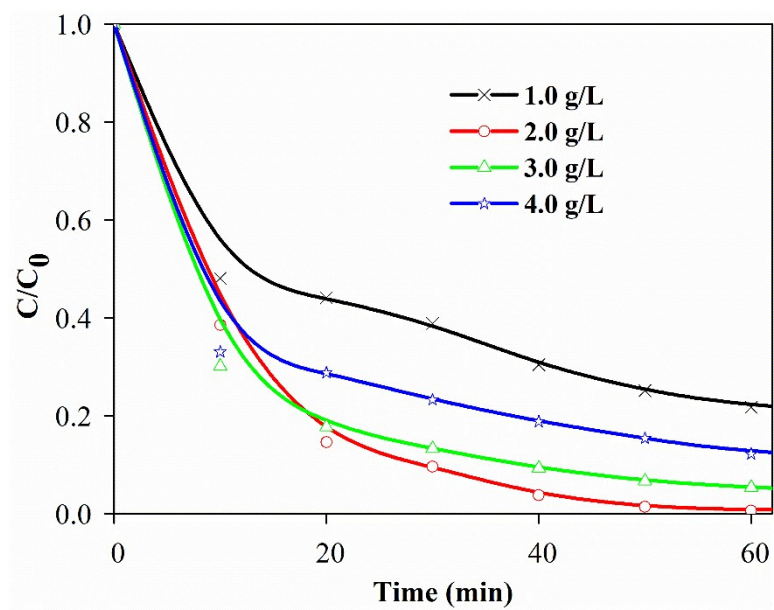

**Figure S4.** Effects of catalyst addition on MO oxidation. Experimental conditions: pH 5.0, 20 mM  $H_2O_2$ ,  $T = 30^\circ C$  and  $100 \text{ mg L}^{-1}$  MO.

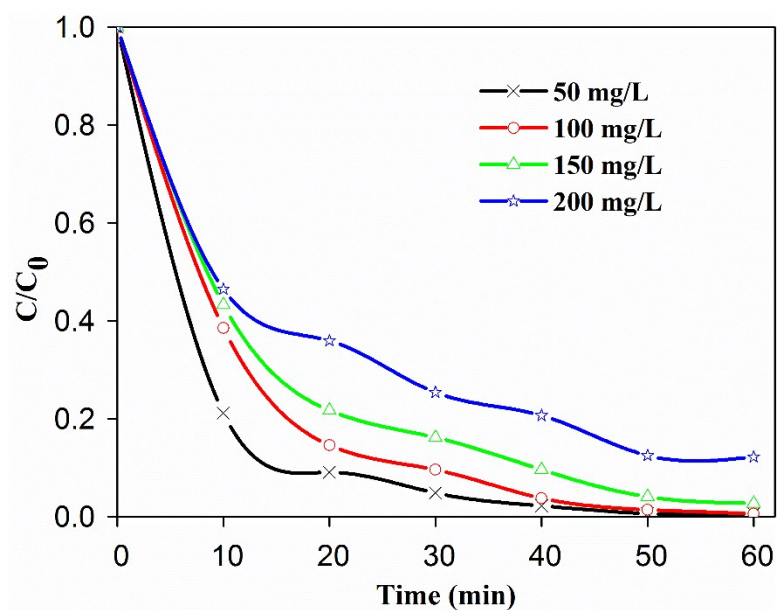

**Figure S5.** Effects of MO concentration on MO oxidation. Experimental conditions:

pH 5.0,  $2.0 \text{ g L}^{-1}$  Fe-Ce/MCM-41 catalyst, 20 mM  $\text{H}_2\text{O}_2$ ,  $T = 30^\circ\text{C}$ .
